1 **Towards *Mycobacterium tuberculosis* detection at the point-of-care: a**  
2 **brighter solvatochromic probe permits the detection of mycobacteria**  
3 **within minutes**

4  
5 *Mireille Kamariza*<sup>1,\*</sup>, *Samantha G. L. Keyser*<sup>2,\*</sup>, *Ashley Utz*<sup>1</sup>, *Benjamin D. Knapp*<sup>3</sup>,  
6 *Green Ahn*<sup>4</sup>, *C. J. Cambier*<sup>4</sup>, *Teresia Chen*<sup>1</sup>, *Kerwyn Casey Huang*<sup>3,5,6,7</sup>, *Carolyn R.*  
7 *Bertozzi*<sup>2,4,8,†</sup>

8  
9 Author Affiliations

10 <sup>1</sup>Department of Biology, Stanford University, Stanford, CA 94305, USA

11 <sup>2</sup>Department of Chemistry, University of California, Berkeley, Berkeley, CA 94720, USA

12 <sup>3</sup>Biophysics Program, Stanford University, Stanford, CA 94305, USA

13 <sup>4</sup>Department of Chemistry, Stanford University, Stanford, CA 94305, USA

14 <sup>5</sup>Department of Bioengineering, Stanford University, Stanford, CA 94305, USA

15 <sup>6</sup>Department of Microbiology and Immunology, Stanford University School of Medicine, Stanford,  
16 CA 94305, USA

17 <sup>7</sup>Chan Zuckerberg Biohub, San Francisco, CA 94158, USA

18 <sup>8</sup>Howard Hughes Medical Institute, Stanford University, Stanford, CA 94305, USA

19

20

21

22

23 \*These authors contributed equally.

24 †All correspondence should be addressed to [bertozzi@stanford.edu](mailto:bertozzi@stanford.edu)

25 **ABSTRACT**

26 There is an urgent need for point-of-care tuberculosis (TB) diagnostic methods that are fast,  
27 inexpensive, and operationally simple. Here, we report on a bright solvatochromic dye trehalose  
28 conjugate that specifically detects *Mycobacterium tuberculosis* (Mtb) in minutes. 3-  
29 hydroxychromone (3HC) dyes, known to yield high fluorescence quantum yields, exhibit shifts in  
30 fluorescence intensity in response to changes in environmental polarity. We synthesized two  
31 analogs of 3HC-trehalose conjugates (3HC-2-Tre and 3HC-3-Tre) and determined that 3HC-3-  
32 Tre has exceptionally favorable properties for Mtb detection. 3HC-3-Tre-labeled mycobacterial  
33 cells displayed a 10-fold increase in fluorescence intensity compared to our previously reports on  
34 the dye 4,4-*N,N*-dimethylaminonaphthalimide (DMN-Tre). Excitingly, we detected fluorescent Mtb  
35 cells within 10 minutes of probe treatment. Thus, 3HC-3-Tre permits rapid visualization of  
36 mycobacteria that ultimately could empower improved Mtb detection at the point-of-care in low-  
37 resource settings.

## 38 INTRODUCTION

39 With 1.2 million deaths and 10 million new cases in 2018, tuberculosis (TB) is the most  
40 lethal infectious disease in the world (1). Early detection of the bacterium *Mycobacterium*  
41 *tuberculosis* (Mtb), the causative agent of TB, followed by appropriate treatment could prevent  
42 most deaths (2). The gold standard for TB diagnosis remains a labor-intensive culture test that  
43 requires weeks of incubation time in specialized facilities. Although more rapid tests are available,  
44 they present several important limitations. PCR-based tests are expensive and require skilled  
45 technicians. Microscopy-based methods are attractive in low-resource settings as they are low-  
46 cost, have fast turnaround times, and report on people at greatest risk of transmission and death  
47 (3). As a result, the sputum smear microscopy test is the most widely used technique for TB  
48 diagnosis. The century-old smear test is based on the susceptibility of fluorescent auramine dye  
49 or colored Ziehl-Neelson (ZN) stain to accumulate within the highly hydrophobic mycobacterial  
50 cell wall (4–7). While effective for identification of Mtb cells, this process requires multiple wash  
51 steps to reduce non-specific background fluorescence, or in the case of the ZN test, a rigorous  
52 counterstaining procedure so that stained Mtb cells can be visualized (8,9). Moreover, the smear  
53 test does not distinguish live from dead cells, and this capability is vital in order to assess  
54 treatment efficacy early and accurately (2).

55 In the last decade, we and others have leveraged the trehalose metabolism of  
56 mycobacteria to mark them for detection by various imaging methods (10–20). Exogenous  
57 trehalose molecules can be directly mycolylated at the 6 position by antigen 85 (Ag85) enzymes  
58 to form trehalose monomycolates (TMM) that are inserted into the mycobacterial cell wall, termed  
59 the mycomembrane (10). Researchers have shown that Ag85 enzymes are promiscuous enough  
60 to tolerate perturbations of varying sizes such as azide (11), alkyne (12), fluorine (13–15), and  
61 fluorophore (13,16) groups that permit visualization of the mycomembrane as long as the cell is  
62 metabolically active. However, these fluorescent probes require extensive washing before  
63 imaging in order to reduce background signal.

64 Fluorogenic probes, i.e. probes that turn on when metabolized in cells, have proven better  
65 suited for TB detection as they require minimal processing. Previous studies have used quenched  
66 trehalose fluorophores that become unquenched by Ag85 activity, allowing visualization of  
67 growing mycobacterial cells in real-time (17). A dual enzyme-targeting fluorogenic probe allowed  
68 the detection of Mtb cells within an hour using a microfluidic system (18). In addition, we reported  
69 on a solvatochromic trehalose probe (DMN-Tre) that can detect live Mtb cells in TB patient sputum  
70 samples (19). Solvatochromic dyes change their color or fluorescence intensity based on the  
71 polarity of the solvent. As a result, these compounds are advantageous for monitoring changes

72 in hydrophobicity of a molecule of interest (20). Upon acylation of DMN-Tre by Ag85 and insertion  
73 of the corresponding trehalose monomycolate (TMM) analog into the mycomembrane, dye  
74 fluorescence is turned on, which allows the detection of live mycobacteria with a fluorescence  
75 microscope (**Figure 1A**) (19,21). In this context, DMN-Tre has many favorable properties for  
76 point-of-care deployment: its operationally simple procedure does not require any wash steps,  
77 and it is synthetically convenient and chemically stable. However, the DMN dye is a fluorophore  
78 of relatively low brightness, with a molar extinction coefficient of  $8800 \text{ M}^{-1} \text{ cm}^{-1}$  in TBS buffer (20)  
79 and a low quantum yield of fluorescence in low-dielectric solvents (0.288 in DMF) (22).  
80 Consequently, in practice we found that: 1) low-powered fluorescence microscopes currently  
81 available in TB health centers may miss labeled cells, and 2) Mtb cells must be labeled with DMN-  
82 Tre for at least one hour to achieve detectable levels of fluorescence using standard clinical  
83 fluorescence microscopes.

84 To address these obstacles for point-of-care TB detection, we aimed to develop probes  
85 that are brighter and enable faster detection of live Mtb cells. Here, we report the development of  
86 a brighter solvatochromic trehalose probe, based on the 3-hydroxychromone (3HC) dye (**Figure**  
87 **1B**). The 3HC trehalose conjugate (termed 3HC-3-Tre) demonstrated high fluorescence turn-on  
88 in hydrophobic solvents as well as when incorporated in the mycobacterial cell surface. This  
89 labeling was specific to the trehalose moiety and was detectable without any wash steps.  
90 Additionally, the fluorescence intensity of 3HC-3-Tre was 10-fold brighter than DMN-Tre. Finally,  
91 the high signal-to-noise ratio of 3HC-3-Tre permitted simple detection of labeled Mtb cells within  
92 10 minutes. Thus, 3HC-3-Tre reagent permits the rapid visualization of mycobacteria and  
93 ultimately, could be used to improve Mtb detection at the point-of-care in low-resources settings.

94

## 95 **RESULTS**

### 96 ***Synthesis of 3HC solvatochromic dyes bound to trehalose***

97 To design a probe with stronger turn-on fluorescence than DMN, we relied on previously  
98 reported solvatochromic dyes that fit our target profile. We identified a highly promising class of  
99 solvatochromic dyes that are well characterized, synthetically tractable, and have been used in  
100 living systems with minimal perturbations (**Figure 1B**) (20). These dyes are based on a 3-  
101 hydroxychromone (3HC) scaffold with the advantage of greater tunability due to their synthetic  
102 modularity and high quantum fluorescence yield. Moreover, they are further red-shifted, which  
103 may minimize background fluorescence.

104 We began by synthesizing 6-Br-Ac<sub>7</sub>-Tre (**Figure 2**). An Appel reaction using N-  
105 bromosuccinimide and triphenylphosphine resulted in a mixture of mono-brominated target

106 compound (6-Br-Tre), a dibrominated side product (6,6'-dibromo-6,6'-dideoxy- $\alpha,\alpha'$ -trehalose),  
107 and unreacted starting material. The crude material was then acetylated and purified to give 6-  
108 Br-Ac<sub>7</sub>-Tre (**Compound 2**). Next, we considered the synthesis of 3HC dyes, here referred to as  
109 3HC-3 (**Compound 3**) and 3HC-2 (**Compound 4**) (23–26). We followed a previous study (23) to  
110 achieve synthesis of the aldehyde precursor to 3HC-2 by reacting 3-diethylaminophenol with  
111 bromoacetaldehyde diethyl acetal (**Scheme S1**). The intermediate was purified, then  
112 subsequently treated with phosphorus(V) oxychloride and *N,N*-dimethylformamide (DMF) to form  
113 the benzofuran and to install an aldehyde at the 2-position via a Vilsmeier-Haack reaction. To  
114 synthesize the aldehyde precursor to 3HC-3 (**Compound 3**), we nitrated 2-bromo-9,9-  
115 dimethylfluorene at the 7-position, reduced the nitrate to an amine, alkylated the amine using ethyl  
116 iodide, and converted the bromine to an aldehyde through a Bouveault reaction. To form 3HC-2  
117 and 3HC-3, each aldehyde was reacted with 2'-hydroxyacetophenone, then treated with hydrogen  
118 peroxide to obtain the desired products (**Figure 2B**) (27). Finally, to create the dye-Tre probes,  
119 the aromatic hydroxyl group on the dye was deprotonated with potassium carbonate and used to  
120 displace the bromine atom on 6-Br-Ac<sub>7</sub>-Tre (**Figure 2C**) (28). The crude dye-Ac<sub>7</sub>-Tre was then  
121 deacetylated with catalytic sodium methoxide and purified to produce the final dye-Tre products  
122 in yields ranging from 9-63% over three steps. We also synthesized glucose control compounds  
123 in a similar fashion (**Scheme S2**).

124

### 125 ***3HC-trehalose probes label Mycobacterium smegmatis (Msmeg) cells more*** 126 ***effectively than DMN-Tre***

127 With these probes in hand, we proceeded to characterize their fluorescence intensities  
128 and emission spectra in mixtures with various ratios of dioxane and water. The dyes were excited  
129 at the optimal excitation wavelengths (405 nm for DMN-Tre and 3HC-3-Tre, 488 nm for 3HC-2-  
130 Tre) and fluorescence intensities were measured over a range of emission wavelengths (**Figure**  
131 **3**). As expected, all probes displayed increased fluorescence as the amount of dioxane increased.  
132 DMN-Tre and 3HC-3-Tre both absorbed most strongly at 405 nm and had comparable  
133 fluorescence intensities in each solvent mixture tested, although the spectra for 3HC-3-Tre were  
134 slightly red-shifted (**Figure 3A,B**). 3HC-2-Tre responded well to excitation at 405 nm and 488 nm,  
135 although its fluorescence intensity was less sensitive to changes in hydrophobicity overall (**Figure**  
136 **3C**). However, because the emission spectra underwent a bathochromic shift as solvent polarity  
137 increased, significant differences in intensity still occurred between 500 and 550 nm, the  
138 approximate range of wavelengths allowed through the GFP emission filter.

139 We also assessed labeling conditions for *Mycobacterium smegmatis* (Msmeg), a  
140 nonpathogenic and fast-growing member of the *Mycobacterium* genus commonly used as a  
141 model organism for Mtb. Msmeg cells were grown to an optical density at wavelength 600 nm  
142 (OD<sub>600</sub>) of 0.5, then incubated with 1, 10, or 100 μM of each probe for 1 hour at 37 °C, washed  
143 three times, and analyzed by flow cytometry using a variety of excitation and emission filter sets  
144 (**Figure 4**). As expected, we observed that all trehalose probes labeled Msmeg in a concentration-  
145 dependent manner. As well, 3HC-3-Tre and 3HC-2-Tre-labeled cells reached much higher levels  
146 of fluorescence intensity compared to DMN-Tre-labeled bacteria (approximately 10-fold and 100-  
147 fold higher for 3HC-3-Tre and 3HC-2-Tre, respectively). While DMN-Tre's fluorescence was  
148 optimally detected with 405/525 (ex/em) nm filter sets (**Figure 4A**), we determined that the optimal  
149 fluorescence detection filter sets for 3HC-3-Tre and 3HC-2-Tre probes were 405/525 and 488/525  
150 nm, respectively (**Figure 4B,C**). Excitingly, even with 10-fold lower concentrations, 3HC-3-Tre-  
151 labeled Msmeg cells demonstrated nearly 5-fold greater fluorescence intensity compared to DMN-  
152 Tre.

153

### 154 ***3HC-3-Tre rapidly and stably labels mycobacteria in a trehalose-dependent manner***

155 For the dyes to be useful in the field, the labeling procedure must follow a simple protocol.  
156 Thus, we sought to determine whether a wash step is necessary based on the degree of  
157 background signal when Msmeg cells are labeled with each trehalose probe, glucose-dye control,  
158 or free dye. We incubated Msmeg cells with DMN-Tre, 3HC-3-Tre, or 3HC-2-Tre (along with their  
159 respective glucose and sugar-free analogs) for 1 hour at 37 °C and performed fluorescence  
160 microscopy either immediately or after a wash step with PBS (**Figure 5**). As anticipated, we  
161 observed fluorescent Msmeg cells labeled with DMN-Tre, while the fluorescence of DMN-Glc-  
162 labeled Msmeg was washed off with PBS (**Figure 5A**), suggesting that the non-specific turn-on  
163 of DMN-Glc molecules is likely due to proximity to Msmeg cells. Surprisingly, we observed no  
164 fluorescence with 3HC-3-Glc-labeled Msmeg cells, even in unwashed samples (**Figure 5B**,  
165 **Figure S1A**), suggesting that internalization of the probe is required for fluorescence turn-on of  
166 3HC-3. Interestingly, we observed labeling of Msmeg cells with 3HC-2 and 3HC-2-Glc, even after  
167 washing (**Figure 5C**, **Figure S1B**), suggesting that 3HC-2 labeling is not specific to the trehalose  
168 pathway. Intrigued by this result, we wondered whether the fluorescence labeling of Msmeg from  
169 3HC-2 dye conjugates would reflect the known trehalose insertion patterning.

170 Previous studies demonstrated that exogenous trehalose molecules are mycolylated at  
171 the 6 position via action of Ag85 enzymes, which are localized at the septa and poles of the cell  
172 envelope (10,19). We hypothesized that 3HC-2 labeling occurs in an Ag85-independent manner

173 and therefore would not exhibit polar and septal fluorescence. Using total internal reflection  
174 fluorescence (TIRF) microscopy, we placed Msmeg cells into a microfluidic flow cell (Methods),  
175 introduced liquid growth medium containing DMN-Tre, 3HC-3-Tre, 3HC-2-Tre, or 3HC-2-Glc, and  
176 performed time-lapse microscopy (**Figure 6, Figure S2**). Similar to DMN-Tre, 3HC-3-Tre labeling  
177 of Msmeg cells showed septal and polar labeling (**Figure 6A**, top two panels). We observed no  
178 enhancement in polar or septal fluorescence localization for Msmeg cells labeled with 3HC-2-Tre  
179 or 3HC-2-Glc (**Figure 6A**, bottom two panels), further suggesting that this labeling likely does not  
180 depend on the trehalose metabolic pathway.

181 After 30 minutes of labeling, we washed out the exogenous dye and continued to acquire  
182 fluorescence images. To address the rate of fluorescence change during labeling and washout,  
183 we pooled the total cell fluorescence at each timepoint and quantified the mean total and volume-  
184 normalized fluorescence across cells (**Figure 6B**). During labeling, the volume-normalized  
185 fluorescence initially increased rapidly and then started to plateau; by 10 min, cells reached ~50%  
186 of the labeling at 30 min, confirming rapid labeling of all three probes. During washout, total  
187 fluorescence was gradually lost (**Figure 6B**). We fit the washout dynamics to an exponential  
188  $I(t) = I_0 + I_1 e^{-\gamma t}$ . Washout of DMN-Tre labeling was slow, likely because it depends on  
189 mycomembrane turnover (**Figure 6Bi, Figure S2A**). Compared to DMN-Tre, cells labeled with  
190 3HC-3-Tre or 3HC-2-Tre exhibited a rate of fluorescence loss  $\gamma$  that was 2.3- and 5.9-fold higher  
191 than DMN-Tre, respectively (**Figure 6Bii,iii, Figure S2B,C**), suggesting additional labeling  
192 mechanisms beyond trehalose synthesis. In particular, the washout time scale for 3HC-2-Tre was  
193  $\ln 2 / \gamma = 7.4$  min, reflecting trehalose-independent transient binding and/or turn-on. Nonetheless,  
194 we confirmed that 3HC-3 and 3HC-3-Glc do not label Msmeg cells (**Figure S2E,F**), indicating the  
195 specificity of 3HC-3-Tre for trehalose. Taken together, these data demonstrate 3HC-3-Tre, but  
196 not 3HC-2-Tre, is an excellent candidate for the rapid detection of mycobacteria. Moving forward,  
197 we focused our efforts on the 3HC-3-Tre probe.

198

### 199 ***3HC-3-Tre labeling of Msmeg cells is much brighter than DMN-Tre and selective for*** 200 ***Actinobacteria***

201 Our next goal was to assess the specificity of 3HC-3-Tre labeling of mycobacteria  
202 compared with bacterial species that do not incorporate trehalose into their cell envelopes (**Figure**  
203 **7**). We analyzed Msmeg cells incubated with 1, 10, or 100  $\mu\text{M}$  of 3HC-3-Tre or 3HC-3-Glc (as a  
204 negative control) for 1 hour at 37 °C. We found that 100  $\mu\text{M}$  3HC-3-Tre-labeled cells were 100-  
205 fold brighter compared to background (**Figure 7A**). Importantly, in the same conditions, the  
206 fluorescence intensity of 3HC-3-Tre-labeled cells was 10-fold greater than that of DMN-Tre-

207 labeled cells (**Figure 7B**), confirming that 3HC-3-Tre is a much brighter option than DMN-Tre. We  
208 previously reported that DMN-Tre selectively labeled organisms within the Actinobacteria  
209 suborder (16,19). To test whether a similar labeling pattern persisted for 3HC-3-Tre, we labeled  
210 Msmeg, *Corynebacterium glutamicum* (Cg), *Bacillus subtilis* (Bs), *Escherichia coli* (Ec) and  
211 *Staphylococcus aureus* (Sa) with 100  $\mu$ M 3HC-3-Tre for 1 hour and analyzed the samples by  
212 microscopy and flow cytometry (**Figure 7C,D**). Similar to DMN-Tre, we observed bright labeling  
213 of Msmeg and Cg cells, consistent with both of these organisms utilizing trehalose in their cell  
214 envelopes. Although not detected by microscopy, there was minimal but significant fluorescence  
215 from labeled Bs, Ec, and Sa cells compared to the no-dye control using flow cytometry (**Figure**  
216 **7C**), perhaps reflecting a trehalose-independent pathway that led to faster washout of 3HC-3-Tre  
217 than DMN-Tre (**Figure 6B**).

218 Finally, we assessed labeling of Mtb with 3HC-3-Tre (**Figure 8**). We labeled Mtb strain  
219 H37Ra cells with 100  $\mu$ M 3HC-3-Tre for 1, 2, or 24 hours and then performed microscopy (**Figure**  
220 **8A**). Similar to DMN-Tre, we observed labeling within 1 hour, with little discernible increase in  
221 fluorescence intensity over additional time (**Figure 8A**). By flow cytometry, we were able to detect  
222 significant fluorescence over background within 10 minutes of Mtb H37Ra labeling with 3HC-3-  
223 Tre (**Figure 8B**). In the same conditions, with DMN-Tre we required a minimum of 60 minutes to  
224 accurately detect significant fluorescence over background (19), likely due to the weak brightness  
225 of the fluorophore.

226

## 227 **DISCUSSION**

228 Tuberculosis (TB) remains a major global health threat (1). As it stands, poor detection  
229 methods have contributed to millions of missed TB diagnoses in high-burden, endemic countries  
230 (1,2). Due to the lack of accurate detection tests at the point-of-care, TB transmission rates have  
231 been sustained in low-income countries. In this study, we report on a solvatochromic dye  
232 trehalose conjugate that can swiftly detect mycobacteria. 3HC-3-Tre is a robust fluorogenic probe  
233 that specifically labels Actinobacteria such as Mtb within 10 minutes and can be imaged without  
234 any wash steps. In addition to its utility for research, this set of attributes may enable the rapid  
235 detection of Mtb in sputum samples in low-resource settings.

236 In future work, it may be possible to develop further red-shifted probes such as Nile-red  
237 dyes to minimize background fluorescence and maximize signal-to-background ratio, while  
238 maintaining minimal perturbations to mycobacteria. Furthermore, it is easily conceivable to  
239 synthesize trehalose moieties conjugated to an assortment of colors that span the fluorescence  
240 wavelength range to achieve multimodal labeling of mycobacteria. In addition to trehalose, the



241 dyes could be coupled with other types of bacteria-specific molecules (sugars or amino acids)  
242 that would permit visualization of a subject of interest in various biological systems.

243 Beyond the performance of the detection methods, TB diagnoses in low-income  
244 environments depend on many factors, such as stability, accessibility, and affordability (2). The  
245 solvatochromic dyes are highly stable at room temperature even in temperate environments, can  
246 potentially be coupled with a portable fluorescence detection device, and a reasonable estimate of  
247 cost would be less than 40 cents per test. Because of these unique attributes, it is conceivable to  
248 use these reagents as mobile biomarkers for TB screening in resource-poor, remote  
249 environments. Thus, these novel probes can be used in service of both the scientific community  
250 to uncover mycobacterial metabolism, and also the clinical community at large for TB detection in  
251 high-burden environments.

252

## 253 **METHODS**

254 **Fluorescence spectra procedures.** One microliter ( $\mu\text{L}$ ) of each dye-Tre conjugate (10 mM in  
255 water) was added to 1 mL of water or 99.9%, 99%, 95%, 90%, 75%, or 50% 1,4-dioxane in 1 cm  
256 x 0.4 cm quartz cuvettes (Starna Cells, Inc. 9F-G-10). Fluorescence data were acquired on a  
257 Photon Technology International Quanta Master 4 L-format scanning spectrofluorometer  
258 equipped with an LPS-220B 75-W xenon lamp and power supply, an A-1010B lamp housing with  
259 an integrated igniter, a switchable 814 photon-counting/analog photomultiplier detection unit, and  
260 an MD5020 motor driver. In the associated FelixGX software (v. 4.3.4.2010.6904), spectra were  
261 acquired using standard emission scan settings with the exception of the lamp slit widths, which  
262 were all set to 1 nm. Compounds were excited at 405, 488, 532, or 561 nm and emission intensity  
263 was monitored over 415-600 nm, 500-700 nm, 545-700 nm, or 575-750 nm, respectively. Data  
264 were exported as a text file and processed in Excel. Prism 7 (GraphPad) was used to create the  
265 figures from the final data.

266

267 **General procedures for bacterial culture inoculation.** Cultures of *Mycobacterium smegmatis*  
268 (*Msmeg*), *Mycobacterium marinum* (*Mmar*), *Corynebacterium glutamicum* (*Cg*), *Bacillus subtilis*  
269 (*Bs*), *Escherichia coli* (*Ec*), and *Staphylococcus aureus* (*Sa*) were grown as described previously  
270 (6). Briefly, *Msmeg* single colonies were inoculated in BD Difco Middlebrook 7H9 media  
271 (supplemented with 10% (v/v) oleate-albumin-dextrose-catalase (OADC) enrichment, 0.5% (v/v)  
272 glycerol, and 0.5% (w/v) Tween 80) and incubated at 37 °C overnight. For *Cg*, *Bs*, *Ec*, and *Sa*,  
273 single colonies were inoculated in LB medium. *Cg* cultures were incubated at 30 °C, and *Bs*, *Ec*,  
274 and *Sa* cultures were incubated at 37 °C, all overnight. A 1-mL aliquot of *Mmar* (stored as a frozen

275 stock in 50% glycerol/50% 7H9 medium) was thawed, then pelleted at 3,300g for 3 min. Cells  
276 were resuspended in 7H9 media supplemented with 10% (v/v) OADC enrichment, 0.5% (v/v)  
277 glycerol, and 0.5% (w/v) Tween 80, and incubated at 33 °C overnight.

278  
279 **Metabolic labeling experiments.** Experiments were performed as described previously (6).  
280 Briefly, overnight bacterial cultures were grown or diluted to an OD<sub>600</sub> of 0.5 and aliquoted into  
281 Eppendorf tubes. The appropriate amount of stock dye (1 or 10 mM) was added to the aliquots to  
282 reach the indicated final concentration. Control samples were treated identically, without the  
283 addition of any probes. The bacteria were incubated for 1 h at 37 °C (Msmeg, Bs, Ec, Sa) or 30  
284 °C (Cg). At the end of the experiment, samples were analyzed by microscopy and/or flow  
285 cytometry as described below.

286  
287 **Confocal microscopy.** For no-wash imaging, a drop of sample (~5 µL) was taken directly from  
288 the labeled culture. For wash imaging, cells were pelleted at 3300g for 3 min, washed twice with  
289 1x Phosphate Buffered Saline (PBS) supplemented with 5% Tween80 (v/v), and resuspended in  
290 300 µL 1x PBS. Subsequently, a drop of sample (~5 µL) was spotted onto a 1% agarose pad on  
291 a microscope slide, allowed to dry, covered with a cover slip and sealed with nail polish.  
292 Microscopy was performed on a Nikon A1R confocal microscope equipped with a Plan Fluor 60x  
293 oil immersion (NA: 1.30) objective. Samples were excited with a 405-nm violet laser, 488-nm blue  
294 laser, or 561-nm green laser and imaged in the Aqua Amine (425-475 nm), FITC/GFP (500-550  
295 nm), or RFP (570-620 nm) channels, respectively. NIS-Elements AR software (Nikon Inc.) and  
296 Fiji (ImageJ) v. 72 were used to process images. All image acquisition and processing were  
297 executed under identical conditions for control and test samples.

298  
299 **Flow cytometry.** Cells were pelleted at 3300g for 3 min, washed twice with 1x Dulbecco's  
300 phosphate-buffered saline (DPBS; MT-21-030-CV, Thermo Fisher Scientific) supplemented with  
301 5% Tween80 (v/v), and resuspended in 300 µL 1x DPBS. Fluorescence measurements were  
302 taken in 5-mL culture tubes (14-959A, Thermo Fisher Scientific) suitable for flow cytometry.  
303 Experiments were performed on a BD LSR II.UV instrument in the shared Fluorescence Activated  
304 Cell Sorting (FACS) Facility at Stanford University. The instrument, excitation wavelengths, and  
305 filter sets used are noted in each figure or figure caption. Data were obtained for 10,000 cells per  
306 sample, processed using FlowJo, and imported into Prism 7 (Graphpad) for statistical analysis.

307

308 **Single-cell time-lapse microscopy.** Single-cell time-lapse imaging was achieved using a  
309 microfluidic flow cell (CellASIC, B04A) and a custom temperature-controlled microscope system.  
310 Samples of mid-log cultures (200  $\mu$ L) were placed undiluted into loading wells. Wells containing  
311 7H9 medium and 7H9 medium with dye were primed for 10 min at the target temperature under  
312 5 psi. During the experiment, flow was set at 2 psi. Cells were imaged at 1-min time intervals  
313 using a Ti-Eclipse stand (Nikon Instruments) with a Plan Apo 100X DM Ph3 (NA: 1.45) (Nikon)  
314 objective and images were acquired with an iXon EM+ (Andor) camera. All cells were imaged in  
315 phase-contrast and TIRF illumination. Cells stained with dyes excited at peak GFP wavelength  
316 (488 nm; hydroxychromone dyes) were imaged under TIRF illumination to reduce background  
317 signal and photobleaching, for which an OBIS laser (Coherent) light path was guided by an optical  
318 fiber to a TIRF illuminator (Nikon) and focused on the sample. Temperature was maintained at 37  
319  $^{\circ}$ C using a stage-top incubator (Haison) coupled to a heater-controller (Air-Therm). Timing and  
320 control of the system was accomplished through  $\mu$ Manager v. 1.41 (29).

321  
322 **Image analysis.** Image stacks were imported into ImageJ (FIJI) for initial data processing.  
323 Individual isolated cells were selected and cropped as image hyperstacks to include both phase-  
324 contrast and fluorescence channels. Phase-contrast images were used for automated  
325 segmentation analysis using Morphometrics (30) in MATLAB (Mathworks), and outlines were  
326 overlaid on the corresponding fluorescence images for quantifying signal information. Further  
327 analyses were carried out using custom MATLAB scripts. Cellular intensity was normalized to the  
328 peak cellular intensity during labeling for dye constructs with high signal-to-background. The initial  
329 period of fluorescence intensity decay was quantified by nonlinear regression fitting to an  
330 exponential function ( $I(t) = I_0 + I_1 e^{-t/\tau}$ ). For dye constructs with no signal, cellular intensity was  
331 normalized by the mean signal-to-background of the cell to reflect the relative signal.

332  
333 **Metabolic labeling of Mtb.** Mtb cultures were grown via inoculation of a 1-mL frozen stock into  
334 50 mL of Middlebrook 7H9 liquid medium supplemented with 10% (v/v) OADC enrichment (BBL  
335 Middlebrook OADC, 212351), 0.5% (v/v) glycerol, and 0.05% (w/v) Tween 80 (P1754, Sigma-  
336 Aldrich) in a roller bottle. Cells were grown to an OD<sub>600</sub> of 0.5 to begin the experiments. Cells were  
337 incubated with 100  $\mu$ M DMN-Tre or 10  $\mu$ M 3HC3-Tre for the indicated times. Labeled cells were  
338 harvested by centrifugation (3000g for 10 min) and then fixed in an equal volume of 4%  
339 paraformaldehyde (cells were incubated at room temperature for 1 h, with occasional rotation of  
340 the tube to ensure sterilization of all internal surfaces before fluorescence and flow cytometry  
341 analysis)

342

343 **Statistical analysis.** Data are means  $\pm$  SEM from at least two independent experiments. Unless  
344 otherwise specified, all data were analyzed using GraphPad Prism software's ANOVA (analysis  
345 of variance) test, as specified in the figure legends.

346

## 347 **ACKNOWLEDGEMENTS**

348 We thank M. Rajendram, D. M. Fox, and S. Banik for technical assistance and helpful discussions,  
349 and A. Iavarone [QB3/Chemistry Mass Spectrometry Facility, University of California (UC),  
350 Berkeley] for assistance with mass spectrometry. We also thank Aidan Pezacki for research  
351 assistance. Flow cytometry was performed in the shared FACS facility at Stanford University on  
352 equipment obtained with NIH S10 Shared Instrument grant S10RR027431-01. M.K. was  
353 supported by the Stanford University's Diversifying Academia, Recruiting Excellence Fellowship,  
354 and NIH Predoctoral Fellowship F31AI129359. S.G.L.K. was supported in part by a National  
355 Science Foundation Graduate Research Fellowship (Grant No. DGE-1106400). K.C.H. is a Chan  
356 Zuckerberg Biohub Investigator. This research was supported by the Allen Discovery Center at  
357 Stanford on Systems Modeling of Infection (to K.C.H.), and grants from the Bill and Melinda Gates  
358 Foundation (OPP115061) and NIH (AI051622) (to C.R.B.).

359 **FIGURES**

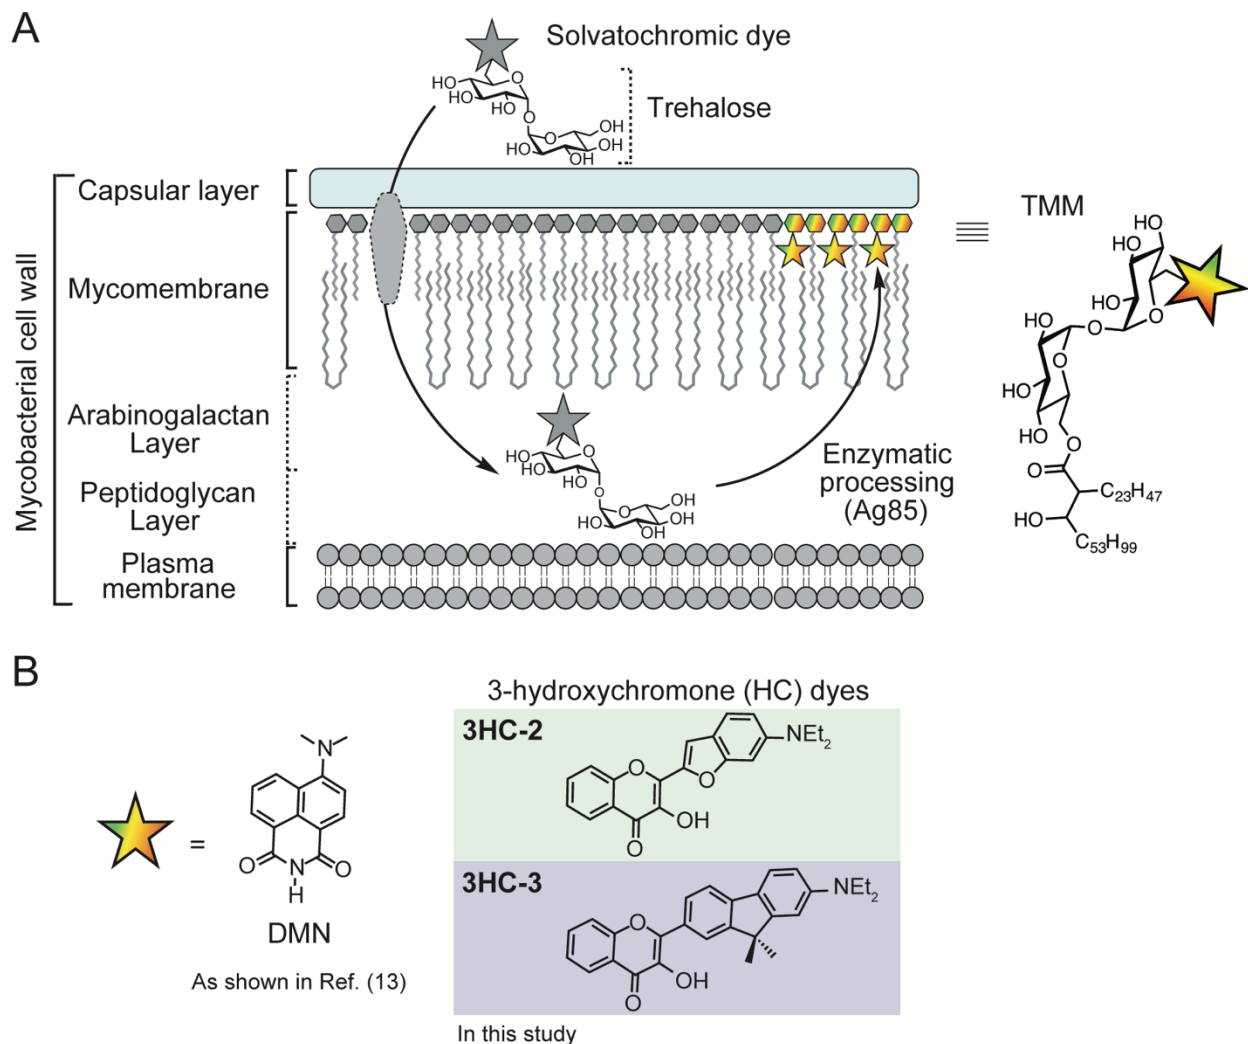

360  
361 **Figure 1. Solvatochromic trehalose probes label the mycobacterial mycomembrane. (A)**  
362 Solvatochromic trehalose probes are converted by mycobacteria to the corresponding trehalose  
363 monomycolate (TMM, structure on right) analogs and inserted into the mycomembrane. There,  
364 they undergo fluorescence turn-on, enabling detection of labeled cells by fluorescence  
365 microscopy. **(B)** Chemical structures of solvatochromic dyes described in this study.

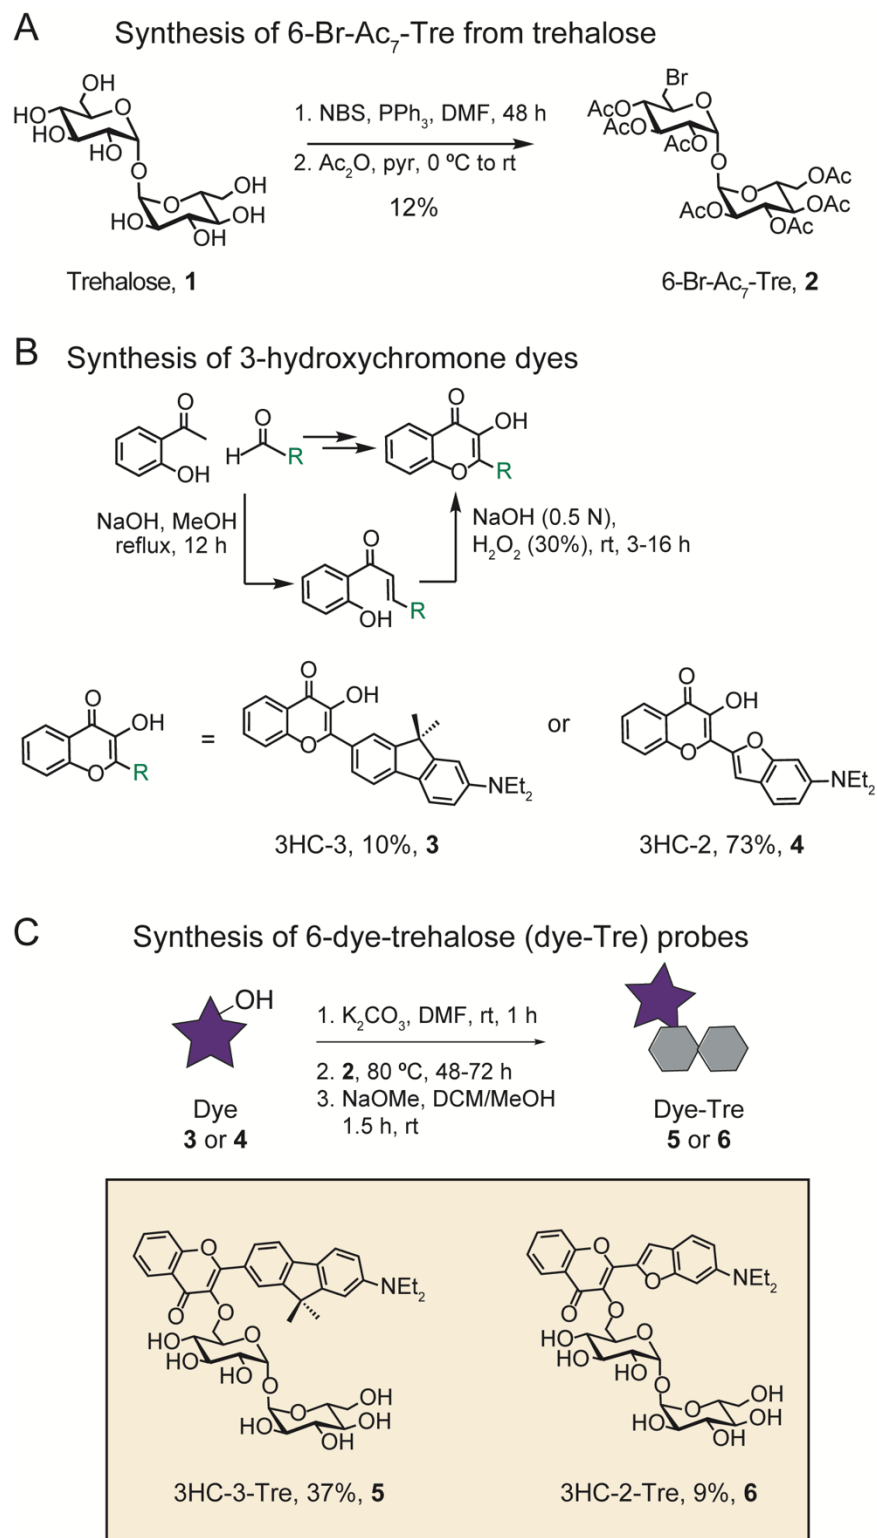

366

367 **Figure 2. Synthetic scheme for 3-hydroxychromone (3HC) trehalose (Tre) dye conjugates.**

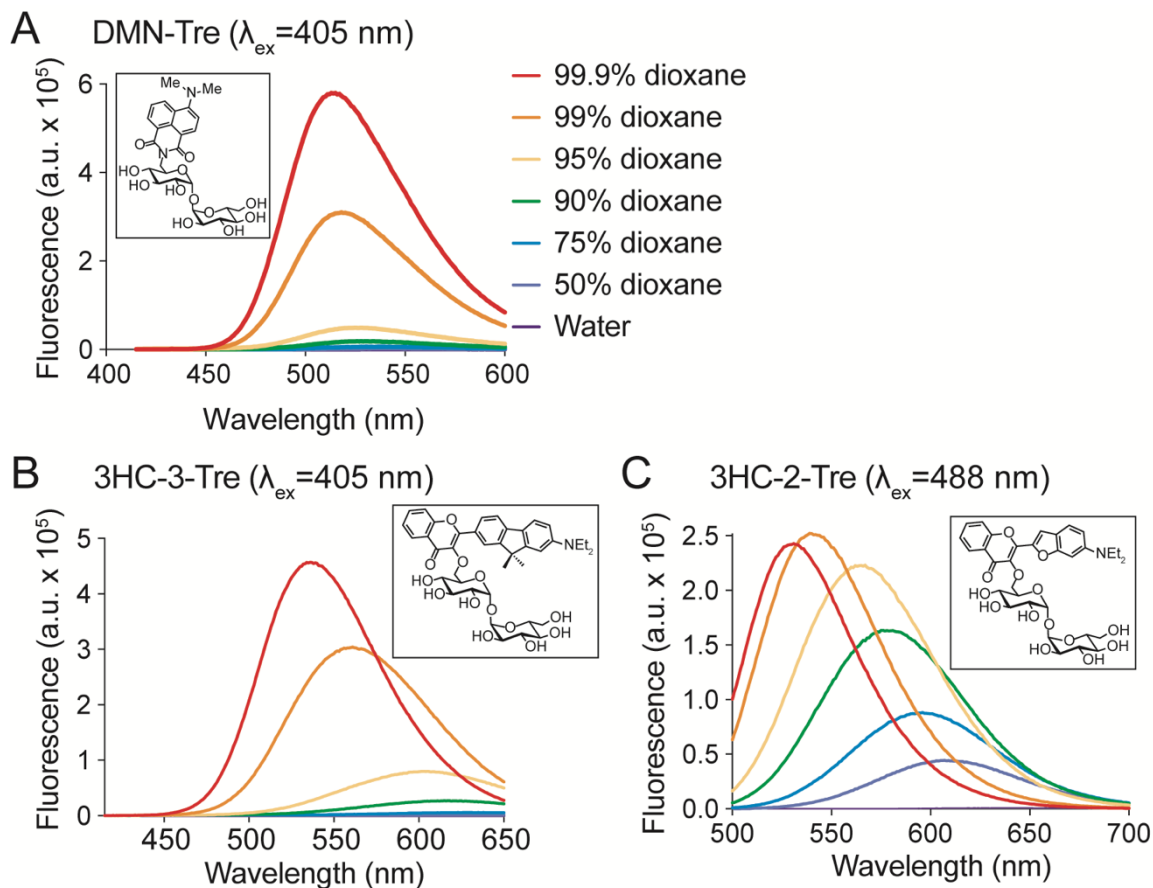

368

369 **Figure 3. Emission spectra of 3-hydroxychromone trehalose dyes.** Fluorescence spectra of  
370 (A) DMN-Tre (ex. 405 nm), (B) 3HC-3-Tre (ex. 405 nm) and (C) 3-HC-2-Tre (ex. 488 nm) in  
371 solvent systems with the indicated ratios of dioxane in water.

### A DMN-Tre

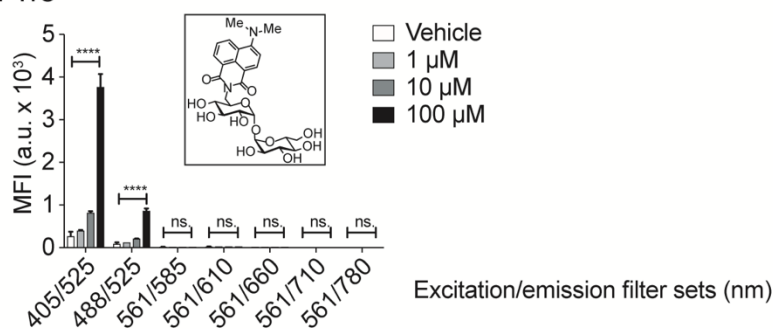

### B 3HC-3-Tre

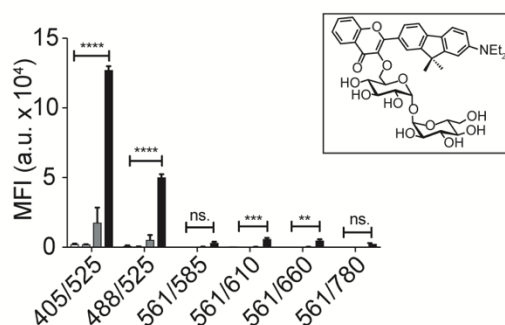

### C 3HC-2-Tre

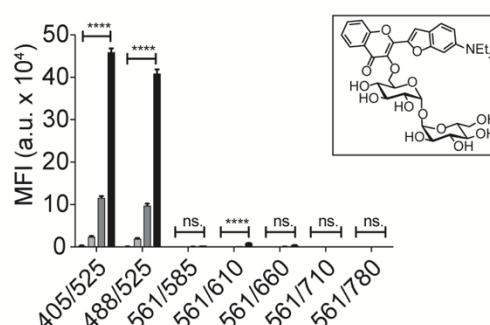

372

373 **Figure 4. Flow cytometry analysis of Msmeg cells labeled with solvatochromic trehalose**  
374 **dyes using various excitation and emission filter sets.** Flow cytometry analysis of Msmeg  
375 labeled with (A) DMN-Tre, (B) 3HC-3-Tre or (C) 3HC-2-Tre. All dyes showed increased labeling  
376 at the highest concentration (100 μM). Cells at OD<sub>600</sub>=0.5 were incubated with the indicated dye-  
377 trehalose probe concentrations for 1 h at 37 °C. MFI = Mean fluorescence intensity. Data are  
378 means ± SEM from at least two independent experiments. Data were analyzed by two-way  
379 analysis of variance (ANOVA) test (\*:  $p < 0.05$ , \*\*:  $p < 0.01$ , \*\*\*:  $p < 0.001$ , \*\*\*\*:  $p < 0.0001$ , ns: not  
380 significant).



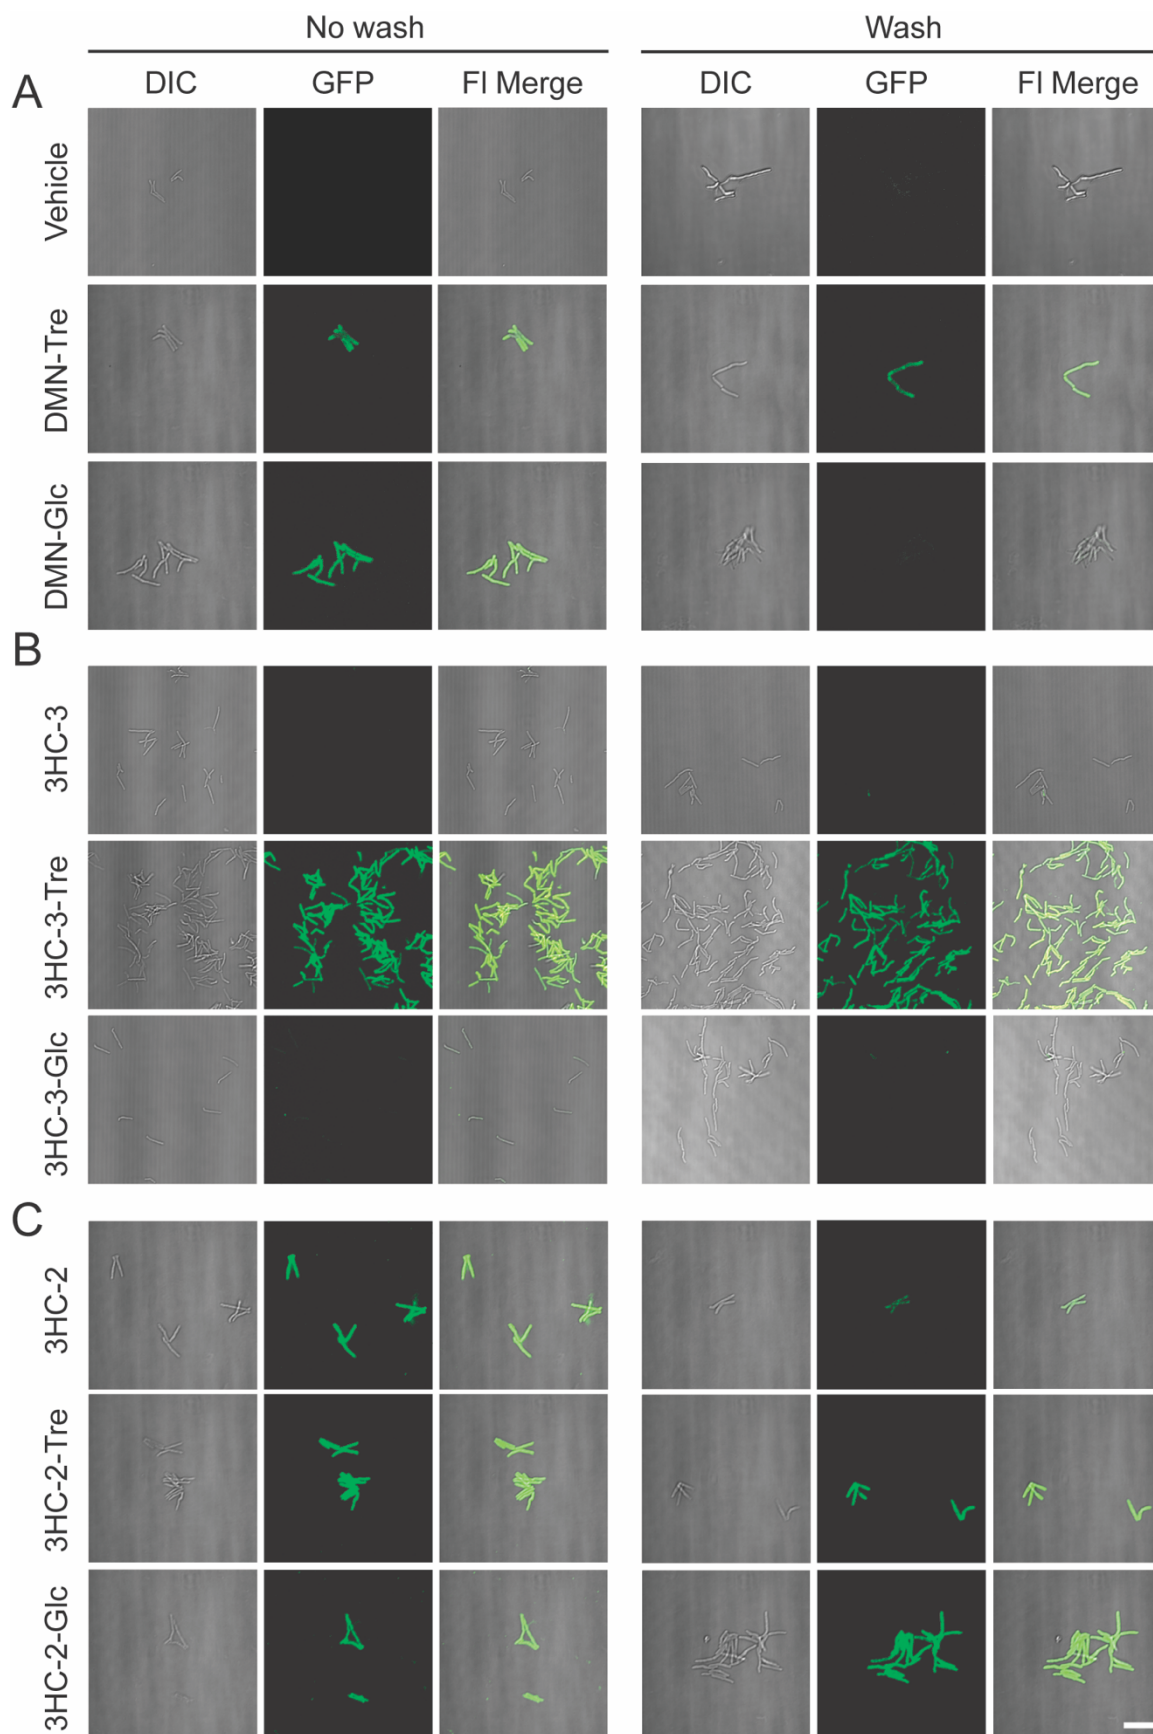

382 **Figure 5. Unlike 3HC-2-Tre, 3HC-3-Tre labeling is dependent on the trehalose moiety.**  
383 Epifluorescence microscopy of Msmeg cells treated with **(A)** 100  $\mu$ M DMN-Tre or DMN-Glc or no  
384 dye control (Vehicle); **(B)** 100  $\mu$ M of 3HC-3, 3HC-3-Tre, or 3HC-3-Glc; **(C)** 100  $\mu$ M of 3HC-2, 3HC-  
385 2-Tre, or 3HC-2-Glc. 3HC-3-Tre showed the most efficient labeling of Msmeg. Cells were  
386 incubated with the indicated dyes for 1 h at 37 °C. Cells were smeared directly (No wash) or  
387 washed 3 times with PBS then smeared onto a microscope slide (Wash). Scale bar: 10  $\mu$ m.

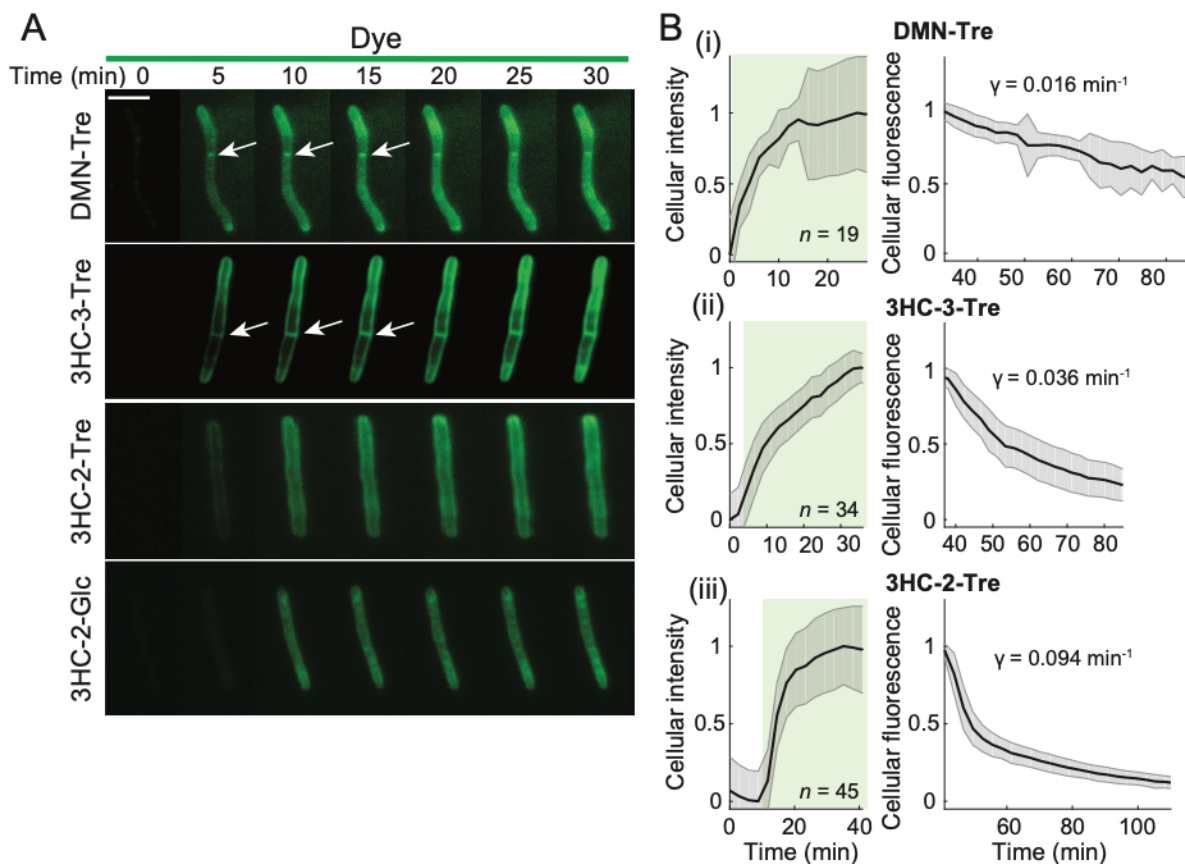

388

389 **Figure 6. Unlike 3HC-2 dye conjugates, 3HC-3-Tre labeling is initially localized at the**  
390 **septum and poles.** (A) Time-lapse microscopy of Msmeg cells treated with 100  $\mu$ M DMN-Tre,  
391 3HC-3-Tre, 3HC-2-Tre, or 3HC-2-Glc for 30 min revealed concentration of 3HC-3-Tre at cell septa  
392 and poles. White arrows denote septal labeling. Scale bar: 5  $\mu$ m. (B) Quantitation of Msmeg  
393 fluorescence in the presence of 100  $\mu$ M (i) DMN-Tre, (ii) 3HC-3-Tre, or (iii) 3HC-2-Tre during  
394 labeling for 30 min (left, volume-normalized intensity) and subsequent washing with growth  
395 medium for 1 h (right, total fluorescence). The number of cells included in each analysis ( $n$ ) is  
396 provided in each panel. Shaded error bars represent  $\pm 1$  standard deviation.

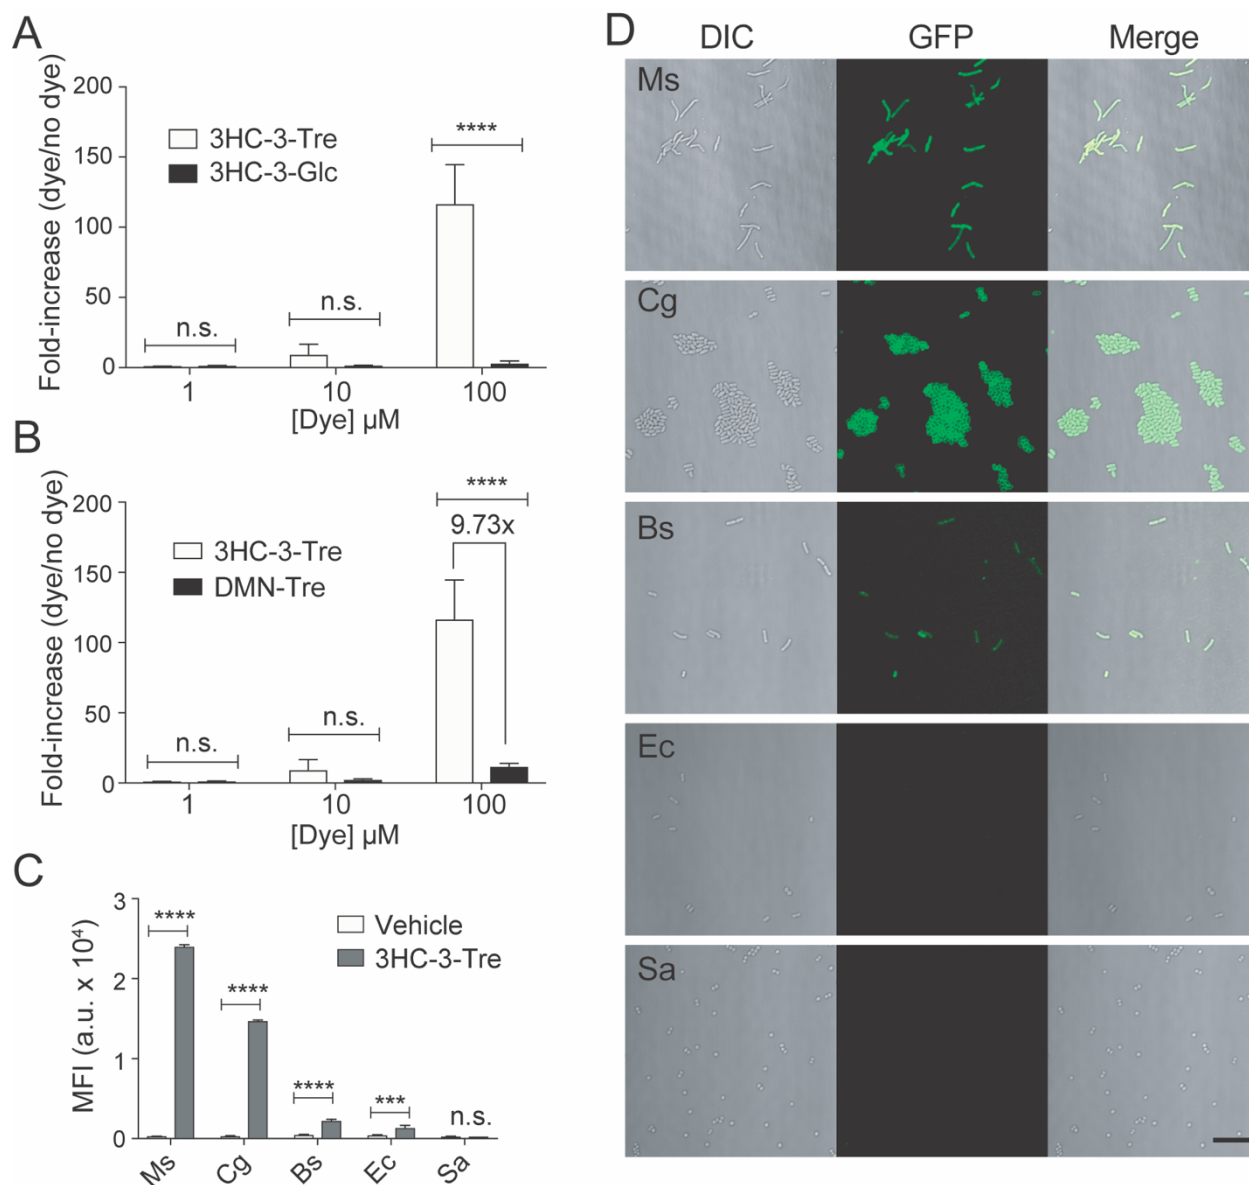

397

398 **Figure 7. Specific labeling of live mycobacteria and corynebacteria with 3HC-3-Tre. (A,B)**

399 Flow cytometry analysis of Msmeg cells incubated for 1 h at 37 °C with (A) 100  $\mu\text{M}$  3HC-3-Tre or

400 3HC-3-Glc, (B) 100  $\mu\text{M}$  3HC-3-Tre or DMN-Tre. (C,D) Flow cytometry (C) and no-wash

401 microscopy (D) analyses of Msmeg (Ms), *C. glutamicum* (Cg), *B. subtilis* (Bs), *E. coli* (Ec), and *S.*

402 *aureus* (Sa) cells incubated for 1 h at 37 °C with 100  $\mu\text{M}$  3HC-3-Tre. 3HC-3-Tre labeling was

403 specific to Msmeg and Cg. Data are means  $\pm$  SEM from at least two independent experiments.

404 Data were analyzed by two-way analysis of variance (ANOVA) test (\*:  $p < 0.05$ , \*\*:  $p < 0.01$ , \*\*\*:

405  $p < 0.001$ , \*\*\*\*:  $p < 0.0001$ , ns: not significant). Scale bar: 10  $\mu\text{m}$ .

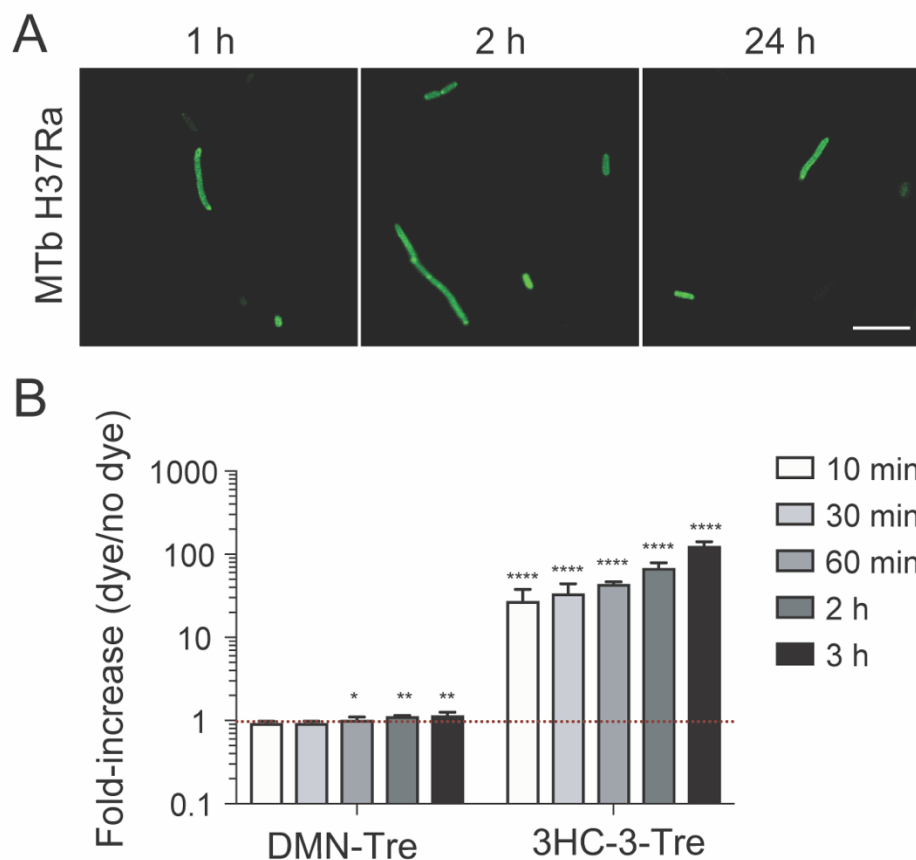

406

407 **Figure 8. Mtb cells labeled with 3HC-3-Tre exhibit increased fluorescence intensities and**  
408 **can be detected within 10 minutes by flow cytometry.** (A) Microscopy analysis of H37Ra Mtb  
409 cells labeled with 100  $\mu$ M 3HC-3-Tre for 1, 2, or 24 h, followed by 4% paraformaldehyde fixation  
410 and fluorescence imaging. Scale bar: 10  $\mu$ m. (B) Flow cytometry analysis of Mtb cells incubated  
411 for the indicated times with 100  $\mu$ M DMN-Tre or 3HC-3-Tre, followed by 4% paraformaldehyde  
412 fixation. Ten minutes was sufficient for nearly complete labeling. Data are means  $\pm$  SEM from at  
413 least two independent experiments. Data were analyzed by two-way analysis of variance  
414 (ANOVA) test (\*:  $p < 0.05$ , \*\*:  $p < 0.01$ , \*\*\*:  $p < 0.001$ , \*\*\*\*:  $p < 0.0001$ , ns: not significant).

415 **REFERENCES**

- 416 1. WORLD HEALTH ORGANIZATION. GLOBAL TUBERCULOSIS REPORT 2019. S.I.:  
417 WORLD HEALTH ORGANIZATION; 2019.
- 418 2. World Health Organization. High-priority target product profiles for new tuberculosis  
419 diagnostics: Report of a consensus meeting [Internet]. Geneva, Switzerland; 2014.  
420 Available from:  
421 [https://apps.who.int/iris/bitstream/handle/10665/135617/WHO\\_HTM\\_TB\\_2014.18\\_eng.pdf?](https://apps.who.int/iris/bitstream/handle/10665/135617/WHO_HTM_TB_2014.18_eng.pdf?sequence=1)  
422 [sequence=1](https://apps.who.int/iris/bitstream/handle/10665/135617/WHO_HTM_TB_2014.18_eng.pdf?sequence=1)
- 423 3. Singhal R, Myneedu VP. Microscopy as a diagnostic tool in pulmonary tuberculosis.  
424 *International Journal of Mycobacteriology*. **2015**, 4(1):1–6.
- 425 4. Ziehl F. Zur farbung des tuberkelbacillus. *Deutsche Medizinische Wochenschrift*. **1882**, 8:451.
- 426 5. Ziehl F. Ueber die Farbung des Tuberkelbacillus. *Deuts Med Wchr*. **1883**, 9:247–9.
- 427 6. Neelsen F. Ein Casuistischer Beitrag zur Lehre von der Tuberkulose. *Centralblatt für die*  
428 *Medizinischen Wissenschaften*. **1883**, 28:497–501.
- 429 7. Hagemann PK. Fluoreszenzfärbung von Tuberkelbakterien mit Auramin. *Münchener*  
430 *Medizinische Wochenschrift*. **1938**, 85:1066–8.
- 431 8. Boyd JC, Marr JJ. Decreasing reliability of acid-fast smear techniques for detection of  
432 tuberculosis. *Ann Intern Med*. **1975**, 82(4):489–92.
- 433 9. Truant JP, Brett WA, Thomas W. Fluorescence microscopy of tubercle bacilli stained with  
434 auramine and rhodamine. *Henry Ford Hosp Med Bull*. **1962**, 10:287–96.
- 435 10. Belisle JT, Vissa VD, Sievert T, Takayama K, Brennan PJ, Besra GS. Role of the Major  
436 Antigen of Mycobacterium tuberculosis in Cell Wall Biogenesis. *Science*. **1997**,  
437 276(5317):1420–2.
- 438 11. Swarts BM, Holsclaw CM, Jewett JC, Alber M, Fox DM, Siegrist MS, et al. Probing the  
439 Mycobacterial Trehalome with Bioorthogonal Chemistry. *J Am Chem Soc*. **2012**,  
440 134(39):16123–6.

- 441 12. Foley HN, Stewart JA, Kavunja HW, Rundell SR, Swarts BM. Bioorthogonal Chemical  
442 Reporters for Selective In Situ Probing of Mycomembrane Components in Mycobacteria.  
443 *Angewandte Chemie International Edition*. **2016**, 55(6):2053–7.
- 444 13. Backus KM, Boshoff HI, Barry CS, Boutureira O, Patel MK, D'Hooge F, et al. Uptake of  
445 unnatural trehalose analogs as a reporter for *Mycobacterium tuberculosis*. *Nature Chemical*  
446 *Biology*. **2011**, 7(4):228–35.
- 447 14. Rundell SR, Wagar ZL, Meints LM, Olson CD, O'Neill MK, Piligian BF, et al. Deoxyfluoro-D-  
448 trehalose (FDTre) analogues as potential PET probes for imaging mycobacterial infection.  
449 *Org Biomol Chem*. **2016**, 14(36):8598–609.
- 450 15. Barry C. Exploiting the biology of trehalose to develop novel imaging probes for tuberculosis.  
451 *The FASEB Journal*. **2016**, 30(1\_supplement):503.1-503.1.
- 452 16. Rodriguez-Rivera FP, Zhou X, Theriot JA, Bertozzi CR. Visualization of mycobacterial  
453 membrane dynamics in live cells. *J Am Chem Soc*. **2017**, 139(9):3488–95.
- 454 17. Hodges HL, Brown RA, Crooks JA, Weibel DB, Kiessling LL. Imaging mycobacterial growth  
455 and division with a fluorogenic probe. *Proc Natl Acad Sci USA*. **2018**, 115(20):5271–6.
- 456 18. Cheng Y, Xie J, Lee K-H, Gaur RL, Song A, Dai T, et al. Rapid and specific labeling of single  
457 live *Mycobacterium tuberculosis* with a dual-targeting fluorogenic probe. *Sci Transl Med*.  
458 **2018**, 10(454).
- 459 19. Kamariza M, Shieh P, Ealand CS, Peters JS, Chu B, Rodriguez-Rivera FP, et al. Rapid  
460 detection of *Mycobacterium tuberculosis* in sputum with a solvatochromic trehalose probe.  
461 *Science Translational Medicine*. **2018**, 10(430):eaam6310.
- 462 20. Klymchenko AS, Mely Y. Fluorescent environment-sensitive dyes as reporters of  
463 biomolecular interactions. *Prog Mol Biol Transl Sci*. **2013**, 113:35–58.
- 464 21. Sahile HA, Rens C, Shapira T, Andersen RJ, Av-Gay Y. DMN-Tre Labeling for Detection and  
465 High-Content Screening of Compounds against Intracellular Mycobacteria. *ACS Omega*.  
466 **2020**, 5(7):3661–9.

- 467 22. McLean AM, Socher E, Varnavski O, Clark TB, Imperiali B, Goodson T. Two-photon  
468 fluorescence spectroscopy and imaging of 4-dimethylaminonaphthalimide peptide and  
469 protein conjugates. *J Phys Chem B*. **2013**, 117(50):15935–42.
- 470 23. Klymchenko AS, Pivovarenko VG, Ozturk T, Demchenko AP. Modulation of the solvent-  
471 dependent dual emission in 3-hydroxychromones by substituents. *New J Chem*. **2003**,  
472 27(9):1336–43.
- 473 24. Kucherak OA, Richert L, Mély Y, Klymchenko AS. Dipolar 3-methoxychromones as bright and  
474 highly solvatochromic fluorescent dyes. *Phys Chem Chem Phys*. **2012**, 14(7):2292–300.
- 475 25. Kucherak OA, Didier P, Mély Y, Klymchenko AS. Fluorene Analogues of Prodan with Superior  
476 Fluorescence Brightness and Solvatochromism. *J Phys Chem Lett*. **2010**, 1(3):616–20.
- 477 26. Klymchenko AS, Ozturk T, Pivovarenko VG, Demchenko AP. A 3-hydroxychromone with  
478 dramatically improved fluorescence properties. *Tetrahedron Letters*. **2001**, 42(45):7967–70.
- 479 27. Gunduz S, Goren AC, Ozturk T. Facile Syntheses of 3-Hydroxyflavones. *Org Lett*. **2012**,  
480 14(6):1576–9.
- 481 28. Junior COR, Castro SBR, Pereira AA, Alves CCS, Oliveira EE, Rêgo RT, *et al*. Synthesis of  
482 genistein coupled with sugar derivatives and their inhibitory effect on nitric oxide production  
483 in macrophages. *European Journal of Medicinal Chemistry*. **2014**, 85:615–20.
- 484 29. Edelstein A, Amodaj N, Hoover K, Vale R, Stuurman N. Computer Control of Microscopes  
485 Using  $\mu$ Manager. *Current Protocols in Molecular Biology*. **2010**, 92(1):14.20.1-14.20.17.
- 486 30. Ursell T, Lee TK, Shiomi D, Shi H, Tropini C, Monds RD, *et al*. Rapid, precise quantification  
487 of bacterial cellular dimensions across a genomic-scale knockout library. *BMC Biology*. **2017**,  
488 15(1):17.

489
